# Supplementary material
Source: PubMed Central journal article supplement (PMC3873480)
Supplement: mmc3.pdf [file mmc3.pdf]

### Supplementary Figure 3

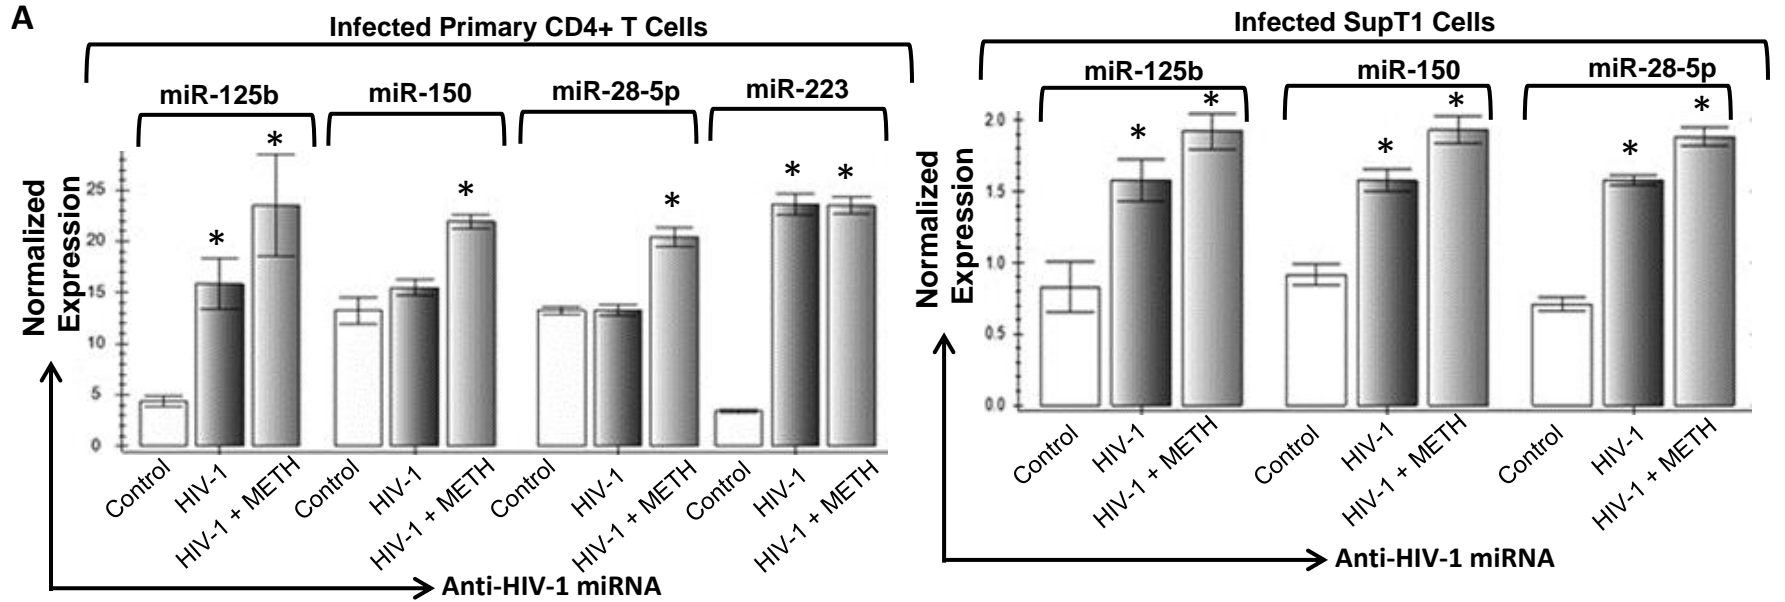

**B**

HIV-1 Genome

AGAGACTTACTCTTGATTGTAACGAGGATTGTGGA<sup>-----</sup>ACTTCTGGGACGCAGGGGGTGGGAAG

Target site for miR-125b (dashed) and miR-150 (solid)
